# Supplementary material
Source: publisher site journal article supplement (https://www.dovepress.com/get_supplementary_file.php?f=369008.docx)
Supplement: Supplementary file 1 [file get_supplementary_file.php]

**Online Supplement**

# Supplemental Methods

*Myocarditis Scoring from 0-5*

Patients were considered to have myocarditis if they met the criteria for a diagnosis of clinically suspected myocarditis proposed in the position statement of the European Society of Cardiology Working group (49). Of these, patients were categorized as “severe” acute myocarditis if they displayed a Grade 3-5 toxicity as defined by criteria adapted from the Common Terminology Criteria for Adverse Events (CTCAE) Version 5.0. Patients were categorized as exhibiting “subclinical myocarditis” if they displayed a persistent low-grade troponin elevation (Grade 2 or less toxicity) not requiring hospitalization. In order to characterize timing and severity of checkpoint associated myocarditis, each patient was scored daily on the basis of their clinical presentation. Myocarditis was scored ranging from 0-5, where a score of 0 was assigned in the absence of any symptoms and in the absence of any laboratory evidence of myocardial inflammatory involvement. A score of 1 was assigned is there was an asymptomatic troponin elevation or other clinical signs of myocarditis. A score of 2 was assigned if laboratory tests were positive with clinical symptoms, but not requiring hospitalization. A score of 3 was assigned if the patient was hospitalized. A score of 4 was assigned if the patient required ICU level care. A score of 5 was assigned on the day of death from myocarditis or its sequelae. Further detail on scoring of myocarditis is found in the clinical paper (47).

**Factor Normalization**

We create normalized parameters from certain factors to assist with visualization, similar to the myocarditis scoring. This normalization does not affect overall correlatability and both instance (normalized and raw) data were included in the data set. **Table 1** demonstrates the list of normalized related factors.

**Supplementary Table S1: Normalized Score of Factors Based on Measured Values**

|  | **Normalized Score** | | | | | | | | | | |
| --- | --- | --- | --- | --- | --- | --- | --- | --- | --- | --- | --- |
| **Factor** | **-5** | **-4** | **-3** | **-2** | **-1** | **0** | **1** | **2** | **3** | **4** | **5** |
| **Troponin**  **(ng/ml)** |  |  |  |  |  | <0.01 | .01- .1 | .1-.5 | 0.5-1 | 1-5 | >5 |
| **CPK**  **(IU/L)** |  |  |  |  |  | <10 | 10-150 | 150-400 | 400-700 | 700-3000 | >3000 |
| **CPK-MB**  **(ng/ml)** |  |  |  |  |  | <3 | 3-8 | 8-14 | 14-25 | 25-40 | >40 |
| **BNP**  **(pg/ml)** |  |  |  |  |  | <20 | 20-40 | 40-100 | 100-350 | 350-700 | >700 |
| **Lactate**  **(mg/dl)** |  |  |  |  |  | <4 | 4-7 | 7-12 | 12-18 | 18-25 | >25 |
| **AST**  **(IU/L)** |  |  |  |  |  | <26 | 26-75 | 75-150 | 150-250 | 250-500 | >500 |
| **LDH**  **(IU/L)** |  |  |  |  |  | <200 | 200-300 | 300-550 | 550-700 | 700-1000 | >1000 |
| **WBC**  **(109/L)** | <0.1 | .1-.9 | .9-1.9 | 1.9-2.9 | 2.9-3.9 | 3.9-6.9 | 6.9-12 | 12-18 | 18-25 | 25-39 | >39 |
| **Lymphocytes (109/L)** |  |  | .5-.9 | .9-3 | 3-6 | 6-11 | 11-16 | 16-19 | 19-26 | 26-32 | >32 |
| **QRS**  **(ms)** |  |  | 40-50 | 50-60 | 60-70 | 70-85 | 85-95 | 95-110 | 110-128 | 128-145 | >145 |
| **Steroid Dose in prednisone equivalents (mg)** |  |  |  |  |  | 0 | 0-5 | 5-25 | 25-100 | 100-500 | >500 |

# Steroid Dosing Metric

Patients typically received IV methylprednisolone and oral prednisone for the treatment of ICI-associated myocarditis. Timing varied as well as dosing. Since there were a variety of steroids used and often mixtures of oral and IV, we converted each steroid dose into milligrams of prednisone equivalents. Steroid use was scored 0-5 based on the milligrams of prednisone equivalents administered each day. Steroid dose was examined both as a dose of prednisone equivalents and as a normalized score of prednisone equivalents in relation to myocarditis score.

# Neural Net Model Structure

#

From these data, the minimum, TMin, and largest, TMax, time for each factor was determined into the time range for the loaded data, the data measurement times, and time constants associated with changes in the metrics. Here, a discrete time interval of δTime = 1 day is used for each step between TMin and TMax. Thus, the number of data points for the patients is defined by eq. (1).

|  | (1) |
| --- | --- |

The data set is populated with existing data using the time stamps, and then empty cells are filled using a linear interpolant.

These time data are then stored into two groups: the original data (as presented above), DPFO, and the normalized data, DPFN, which are defined in eq. (2) - where *F* is the factor of interest. Each factor will thus have a different mean, μ, and standard deviation, *σ*, of the time data array. Additionally, we use accepted “normal” or “healthy” values for μ and *σ*, so that the normalized data are presented in standard deviations from normal.

|  | (2) |
| --- | --- |

Modeling builds a mathematical relationship between inputs and outputs, and by determining the strength of the relationship we can rank the biomarkers – or other signals – that most closely underlie myocarditis. Transfer functions were determined for all factors combined as a single signal, as well as all for each factor on its own. The transfer functions are derived by taking the fast Fourier transform (FFT) of each input, , (e.g., each factor) and output, , (e.g., myocarditis) signals and rearranging them so that the zero-frequency is in the middle using the *fftshift* function in MatLab. The transfer functions are then created by deconvolution using the output signal and any selected inputs as per eq. (3); where *ξ* is a real number that points to a particular signal of interest (e.g., a row of data in a vector). Empty data sets therein (i.e., all zero signals) are removed before convolution to prevent dividing by zero. We then generate output estimates, , using the transfer function ascertained above along with the input, as per eq. (4). This creates an output matrix of the estimates, *Gp*, for each patient, *p*. We then take the Moore-Penrose pseudo-inverse of *G*, denoted as *Gp* which is used to find a matrix of weights, *W*, as per eq. (5). The weights are used to determine the simple optimum transfer function for each patient as per eq. (6).

|  | (3) |
| --- | --- |
|  |  |
|  | (4) |
|  |  |
|  | (5) |
|  |  |
|  | (6) |

The algorithm in MatLab then runs each input parameter sequentially to look for the best fitting model by measuring the minimum calculated error between the real output (measured) and the estimated output (output of the model). The models are rank ordered from lowest to highest error.

# Data Splitting

For data analysis, we split the data based on specific scores or events of interest to be modeled as outcomes. For example, once a patient achieves a myocarditis score of three, it is of interest to investigate the differences in signal leading up to that event, as well as the changes in the signal after the event. To do so, we identified the date of occurrence, t0, based on the time stamped data – either DPFN(t0) or DPFO(t0) – and then split the data into pre-event and post-event data streams, eq. (7-9):

eq. 7

eq.8

eq.9

We then run the NN optimization using the or instead of the whole data stream. This allows us to explore portions of the data and identify specific correlations between the onset of an event, or the progression with respect to the output (i.e., myocarditis).

# Neural Net Optimization

For this study we use a feedforward multilayer perceptron (MPL) artificial NN (NN) for optimization of the transfer functions. The MPL NN includes a single input (one factor/data set per NN), 3 hidden layers, and 1 output (e.g., myocarditis). The NN characteristics also include 10 training iterations, 10 optimization iterations, a ‘linear’ output function, and a NN *alpha* value of 0.01 which represents the learning rate. Optimization was implemented in MATLAB using the ‘mpl’ function (publicly available and written by Ian T Nabley, 1996-2001). The weights in the hidden layers of the NN are optimized using these settings as part of the *netopt* function in MATLAB as part of the same suite. The algorithms work by adjusting the weights of the NN hidden layers until a “best fit” is achieved based on the parameters provided above.

# Model Error Calculations

For any step in the analysis which includes an estimated model (e.g., transfer function), the following method is used for calculating the error. First, an estimated output is calculated using the transfer function, as shown in eq. (4). Then, an RMS error is computed with respect to the original output, as shown in eq. (10). The error is then normalized based on the RMS of the signal, eq. (11).

|  | (10) |
| --- | --- |
|  | (11) |
